# Supplementary material for: Structure and magnetism of the Rh4+-containing perovskite oxides La0.5Sr0.5Mn0.5Rh0.5O3and La0.5Sr0.5Fe0.5Rh0.5O3
Source: Royal Society of Chemistry journal article supplement (doi:10.1039/d0dt02466j), 2020-01-01
Supplement: d0dt02466j1.pdf [file d0dt02466j1.pdf]

Structure and Magnetism of the Rh<sup>4+</sup>-containing perovskite oxides  
La<sub>0.5</sub>Sr<sub>0.5</sub>Mn<sub>0.5</sub>Rh<sub>0.5</sub>O<sub>3</sub> and La<sub>0.5</sub>Sr<sub>0.5</sub>Fe<sub>0.5</sub>Rh<sub>0.5</sub>O<sub>3</sub>

Nijat Hasanli, Alex Scrimshire, Paul A. Bingham, Robert G. Palgrave and  
Michael A. Hayward \*

Supporting Information

Table of Contents

**1. <sup>57</sup>Fe Mössbauer Spectra of La<sub>0.5</sub>Sr<sub>0.5</sub>Fe<sub>0.5</sub>Rh<sub>0.5</sub>O<sub>3</sub>**

**Figure S1.** <sup>57</sup>Fe Mössbauer spectrum collected from La<sub>0.5</sub>Sr<sub>0.5</sub>Fe<sub>0.5</sub>Rh<sub>0.5</sub>O<sub>3</sub> at room temperature. Fit with one doublet fixed at CS = 0 and one free to refine.

**Table S1.** Parameters extracted fit to <sup>57</sup>Fe Mössbauer spectrum collected from La<sub>0.5</sub>Sr<sub>0.5</sub>Fe<sub>0.5</sub>Rh<sub>0.5</sub>O<sub>3</sub> in which one doublet is fixed at CS = 0 and one is free to refine ( $\chi^2 = 0.694$ ).

**2. Fe 2P and Mn 2P spectra of La<sub>0.5</sub>Sr<sub>0.5</sub>Fe<sub>0.5</sub>Rh<sub>0.5</sub>O<sub>3</sub> La<sub>0.5</sub>Sr<sub>0.5</sub>Mn<sub>0.5</sub>Rh<sub>0.5</sub>O<sub>3</sub>.**

**Figure S2.** Fe 2P spectrum of La<sub>0.5</sub>Sr<sub>0.5</sub>Fe<sub>0.5</sub>Rh<sub>0.5</sub>O<sub>3</sub>.

**Figure S3.** Mn 2P spectrum of La<sub>0.5</sub>Sr<sub>0.5</sub>Mn<sub>0.5</sub>Rh<sub>0.5</sub>O<sub>3</sub>.

**3. Magnetic behaviour of La<sub>0.5</sub>Sr<sub>0.5</sub>Mn<sub>0.5</sub>Rh<sub>0.5</sub>O<sub>3</sub>.**

**Figure S4.** Expanded plot of magnetisation-field isotherm collected from La<sub>0.5</sub>Sr<sub>0.5</sub>Mn<sub>0.5</sub>Rh<sub>0.5</sub>O<sub>3</sub> at 5 K, showing the coercive field of the material is 190 Oe.

## 1. $^{57}\text{Fe}$ Mössbauer Spectra of $\text{La}_{0.5}\text{Sr}_{0.5}\text{Fe}_{0.5}\text{Rh}_{0.5}\text{O}_3$

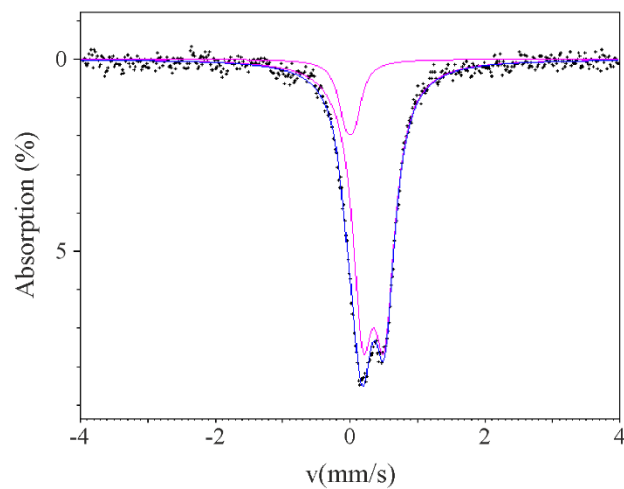

**Figure S1.**  $^{57}\text{Fe}$  Mössbauer spectrum collected from  $\text{La}_{0.5}\text{Sr}_{0.5}\text{Fe}_{0.5}\text{Rh}_{0.5}\text{O}_3$  at room temperature. Fit with one doublet fixed at  $\text{CS} = 0$  and one free to refine.

| Doublet | CS (mm/s) | $\Delta$ (mm/s) | HWHM (mm/s) | Site population (%) |
|---------|-----------|-----------------|-------------|---------------------|
| 1       | 0.351(6)  | 0.323(7)        | 0.189(6)    | 88(2)               |
| 2       | 0         | 0.136(36)       | 0.132(29)   | 12(2)               |

**Table S1.** Parameters extracted fit to  $^{57}\text{Fe}$  Mössbauer spectrum collected from  $\text{La}_{0.5}\text{Sr}_{0.5}\text{Fe}_{0.5}\text{Rh}_{0.5}\text{O}_3$  in which doublet 2 is fixed at  $\text{CS} = 0$  and one is free to refine ( $\chi^2 = 0.694$ ).

**2. Fe 2P and Mn 2P spectra of  $\text{La}_{0.5}\text{Sr}_{0.5}\text{Fe}_{0.5}\text{Rh}_{0.5}\text{O}_3$   $\text{La}_{0.5}\text{Sr}_{0.5}\text{Mn}_{0.5}\text{Rh}_{0.5}\text{O}_3$ .**

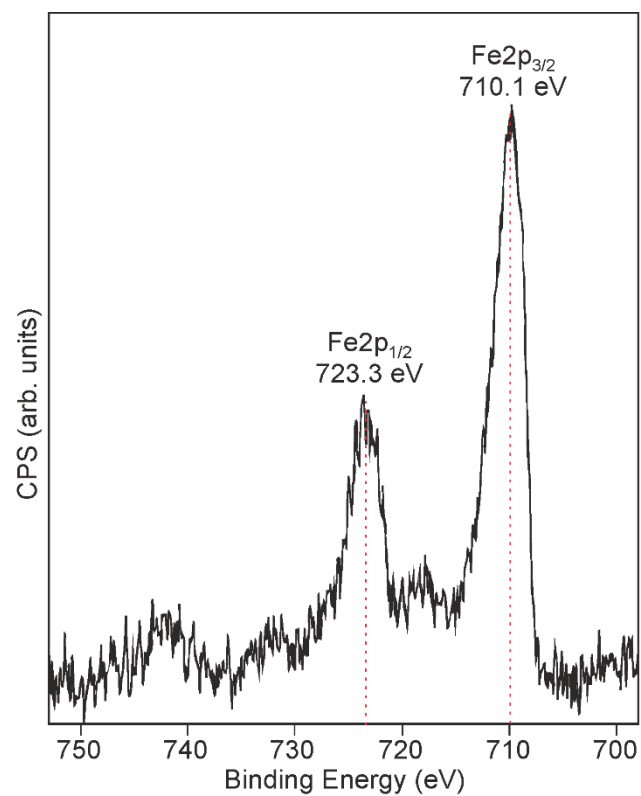

**Figure S2.** Fe 2P spectrum of  $\text{La}_{0.5}\text{Sr}_{0.5}\text{Fe}_{0.5}\text{Rh}_{0.5}\text{O}_3$ .

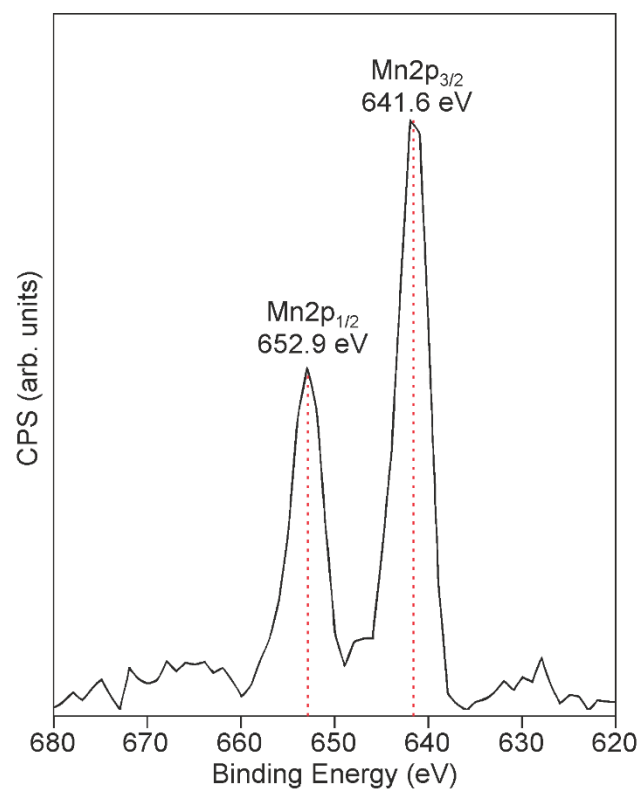

**Figure S3.** Mn 2P spectrum of  $\text{La}_{0.5}\text{Sr}_{0.5}\text{Mn}_{0.5}\text{Rh}_{0.5}\text{O}_3$ .

### 3. Magnetic behaviour of $\text{La}_{0.5}\text{Sr}_{0.5}\text{Mn}_{0.5}\text{Rh}_{0.5}\text{O}_3$ .

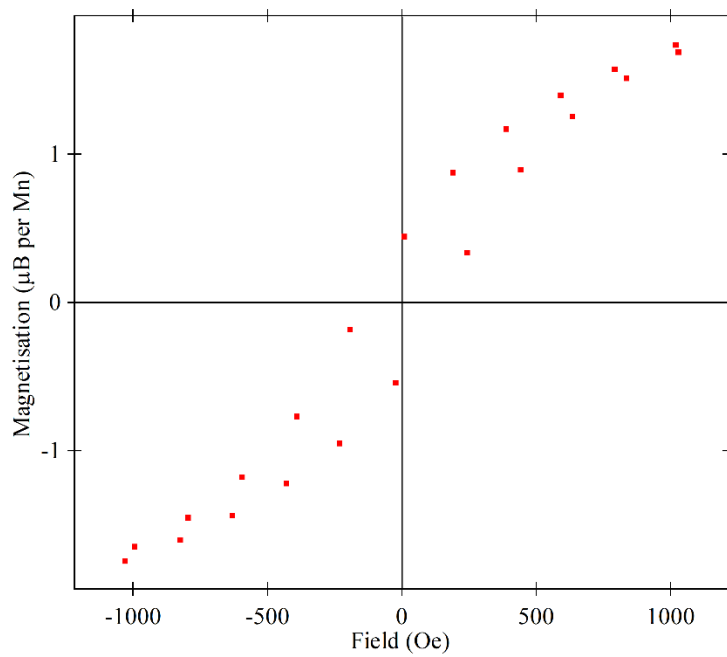

**Figure S4.** Expanded plot of magnetisation-field isotherm collected from  $\text{La}_{0.5}\text{Sr}_{0.5}\text{Mn}_{0.5}\text{Rh}_{0.5}\text{O}_3$  at 5 K, showing the coercive field of the material is 190 Oe.
